# Supplementary material for: The prevalence of extramedullary acute myeloid leukemia detected by 18FDG-PET/CT: final results from the prospective PETAML trial
Source: PubMed Central journal article supplement — Haematologica. 2019 Aug 29;105(6):1552–8. doi: 10.3324/haematol.2019.223032 (PMC7271590; doi:10.3324/haematol.2019.223032), 2020-06
Supplement: 2019.223032.STOLZEL_SUPPL.pdf [file 2019.223032.STOLZEL_SUPPL.pdf]

## The prevalence of extramedullary acute myeloid leukemia detected by <sup>18</sup>F-FDG-PET/CT: final results from the prospective PETAML trial

Friedrich Stölzel,<sup>1</sup> Tors Lür,<sup>1</sup> Steffen Löck,<sup>2</sup> Stefani Parmentier,<sup>3</sup> Friederike Kuithan,<sup>4</sup> Michael Kramer,<sup>1</sup> Nael S. Alakel,<sup>1</sup> Katja Sockel,<sup>1</sup> Franziska Taube,<sup>1</sup> Jan M. Middeke,<sup>1</sup> Johannes Schetelig,<sup>1</sup> Christoph Röllig,<sup>1</sup> Tobias Paulus,<sup>5</sup> Jörg Kotzerke,<sup>6</sup> Gerhard Ehninger,<sup>1</sup> Martin Bornhäuser,<sup>1,7,8</sup> Markus Schaich<sup>3#</sup> and Klaus Zoepfel<sup>6#</sup>

<sup>1</sup>Department of Internal Medicine I, University Hospital Carl Gustav Carus Dresden, Technische Universität Dresden, Dresden, Germany; <sup>2</sup>OncoRay - National Center for Radiation Research in Oncology, University Hospital Carl Gustav Carus, Technische Universität Dresden, Helmholtz Zentrum, Dresden Rossendorf, Germany; <sup>3</sup>Department of Haematology and Oncology, Rems-Murr-Hospital, Winnenden, Germany; <sup>4</sup>Department of Pathology, University Hospital Carl Gustav Carus Dresden, Technische Universität Dresden, Dresden, Germany; <sup>5</sup>Department of Radiology, Städtisches Klinikum Dresden, Dresden, Germany; <sup>6</sup>Department of Nuclear Medicine, University Hospital Carl Gustav Carus, Technische Universität Dresden, Dresden, Germany; <sup>7</sup>National Center for Tumor Diseases NCT, Partner site Dresden, Dresden, Germany; <sup>8</sup>Department of Haematological Medicine, The Rayne Institute, King's College London, London, UK

*#MS and KZ contributed equally as co-senior authors.*

©2020 Ferrata Storti Foundation. This is an open-access paper. doi:10.3324/haematol.2019.223032

Received: March 31, 2019.

Accepted: August 27, 2019.

Pre-published: August 29, 2019.

Correspondence: *FRIEDRICH STÖLZEL* - [friedrich.stoelzel@uniklinikum-dresden.de](mailto:friedrich.stoelzel@uniklinikum-dresden.de)

---

**Supplementary Table S1.** Patients with EM AML per <sup>18</sup>F-DG-PET/CT and per histologically confirmed biopsy and patients with AML without EM AML as per <sup>18</sup>F-DG-PET/CT.

| <b>PETAML</b><br>n = 93*                                        | EM and Histology positive /<br><sup>18</sup> F-DG-PET/CT positive<br>n = 10 | EM negative / <sup>18</sup> F-DG-PET/CT<br>negative<br>n = 72 |
|-----------------------------------------------------------------|-----------------------------------------------------------------------------|---------------------------------------------------------------|
| Median age at diagnosis<br>(range)                              | 62<br>(43 to 77)                                                            | 61.5<br>(27 to 76)                                            |
| Gender, no. (percentage)                                        |                                                                             |                                                               |
| Female                                                          | 4 (40)                                                                      | 33 (46)                                                       |
| Male                                                            | 6 (60)                                                                      | 39 (54)                                                       |
| Median percentage of bone<br>marrow blasts at diagnosis (range) | 77 (0.5 to 95)                                                              | 46.0 (5.0 to 96.5)                                            |
| Median WBC count at diagnosis,<br>× 10 <sup>9</sup> /L (range)  | 7.73 (1.3 to 163)                                                           | 6.1 (.4 to 187.8)                                             |
| Median Serum LDH at diagnosis in<br>mmol*s/l (range)            | 5.8 (2.7 to 25.5)                                                           | 6.2 (2.4 to 36.5)                                             |
| Median Serum C-reactive Protein<br>at diagnosis in mg/L (range) | 23.8 (2.6 to 369)                                                           | 12.4 (0.9 to 297)                                             |
| FAB subtypes at diagnosis<br>no. (percentage)                   |                                                                             |                                                               |
| M0                                                              | 2 (22)                                                                      | 2 (3)                                                         |
| M1                                                              | 1 (11)                                                                      | 14 (20)                                                       |
| M2                                                              | 3 (33)                                                                      | 28 (39)                                                       |
| M4                                                              | 0                                                                           | 9 (13)                                                        |
| M5 a,b                                                          | 2 (22)                                                                      | 8 (11)                                                        |
| M6                                                              | 1 (11)                                                                      | 2 (3)                                                         |
| M7                                                              | 0                                                                           | 3 (4)                                                         |
| RAEB-T                                                          | 0                                                                           | 3 (4)                                                         |
| Cytogenetic subgroups, no.<br>(percentage)                      |                                                                             |                                                               |
| Adverse risk AML                                                | 3 (30)                                                                      | 15 (22)                                                       |
| Intermediate risk AML                                           | 7 (70)                                                                      | 48 (72)                                                       |
| Favorable risk AML                                              | 0                                                                           | 4 (6)                                                         |
| Relapsed AML, no.<br>(percentage)                               | 4 (40)                                                                      | 5 (7)                                                         |

|                                                                    |        |         |
|--------------------------------------------------------------------|--------|---------|
| AML type, no. (percentage)                                         |        |         |
| <i>de novo</i> AML                                                 | 7 (70) | 44 (61) |
| secondary AML (with preceding MDS)                                 | 1 (10) | 18 (25) |
| tAML                                                               | 2 (20) | 10 (14) |
| Extramedullary manifestation in Follow-Up-PET/CT, no. (percentage) |        |         |
| EM-AML positive                                                    | 6 (60) |         |
| EM-AML negative                                                    | 4 (40) |         |

\* The trial included a total of n = 93 AML patients. Nine patients could not be assigned to either group in this table because they were FDG-PET/CT positive for EM AML but did not undergo biopsy/histologic confirmation. Two patients could not be assigned to either group in this table because they were FDG-PET/CT positive for EM AML but on histologic diagnosis of the biopsies could not confirm EM AML but instead other tumors (see *Results*).

**Supplementary Table S2.** Patients undergoing biopsy for diagnosis of EM AML in both cohorts of the PETAML trial.

| <b>PETAML PATIENT COHORT</b>                                               |                                                            |                                                          |
|----------------------------------------------------------------------------|------------------------------------------------------------|----------------------------------------------------------|
| <b>n = 93</b>                                                              | <b>Baseline <sup>18</sup>F-DG-PET/CT positive (n = 21)</b> | <b>Baseline <sup>18</sup>F-DG-PET/CT negative (n=72)</b> |
| No. of patients undergoing biopsy after baseline <sup>18</sup> F-DG-PET/CT | 12                                                         | 3                                                        |
| No. of patients with confirmed EM AML in biopsy                            | 10                                                         | 3                                                        |
| No. of patients with different tumor (other than EM AML) in biopsy         | 2                                                          | 0                                                        |
