# Supplementary material for: The prevalence of extramedullary acute myeloid leukemia detected by 18FDG-PET/CT: final results from the prospective PETAML trial
Source: PubMed Central journal article supplement — Haematologica. 2019 Aug 29;105(6):1552–8. doi: 10.3324/haematol.2019.223032 (PMC7271590; doi:10.3324/haematol.2019.223032), 2020-06
Supplement: 2019_223032-Disclosures_and_Contributions.pdf [file 2019_223032-Disclosures_and_Contributions.pdf]

Haematologica  
HAEMATOL/2019/223032  
Version 3

The prevalence of extramedullary acute myeloid leukemia detected by  
18FDG-PET/CT: final results from the Prospective PETAML Trial

Friedrich Stölzel, Tors Lüer, Steffen Löck, Stefani Parmentier,  
Friederike Kuithan, Michael Kramer, Nael S. Alakel, Katja Sockel,  
Franziska Taube, Jan M. Middeke, Johannes Schetelig, Christoph  
Röllig, Tobias Paulus, Jörg Kotzerke, Gerhard Ehninger, Martin  
Bornhäuser, Markus Schaich, and Klaus Zoepfel

Disclosures: All authors report no conflicts of interest.

Contributions: F.S. designed the study and wrote the study protocol, treated patients, analysed the data and wrote the manuscript. T.L. coordinated the study and analysed data. S.L. and M.K. analysed data. F.K. performed histological analysis of EM AML biopsies. S.P., N.A., K.S. and F.T. treated patients. M.M., J.S. and C.R. analysed data and treated patients. T.P. analysed and interpreted imaging data. J.K., G.E. and M.B. provided institutional support, treated patients and analysed data. M.S. designed the study protocol, treated patients and analysed the data. K.Z. designed the study protocol, treated patients, analysed and interpreted imaging data, analysed the data.
